# Supplementary material for: Sulfonic acid-functionalized organic knitted porous polyaromatic microspheres as heterogeneous catalysts for biodiesel production
Source: Royal Society of Chemistry journal article supplement (doi:10.1039/c8nj02720j), 2018-01-01
Supplement: c8nj02720j1.pdf [file c8nj02720j1.pdf]

## Electronic Supplementary Information

### Sulfonic acid-Functionalized Organic Knitted Porous Polyaromatic Microspheres as Heterogeneous Catalysts for Biodiesel Production

*Anuraj Varyambath, Mi-Ra Kim, and Il Kim\**

BK21 PLUS Center for Advanced Chemical Technology, Department of Polymer Science and  
Engineering, Pusan National University, Busan 609-735, Republic of Korea

\*Corresponding author: [ilkim@pusan.ac.kr](mailto:ilkim@pusan.ac.kr)

**Table S1 The physical properties of Organic Knitted Porous Polymers**

| Name of the catalyst | $S_{BET}$<br>(m <sup>2</sup> /g) | $V_{micro}$<br>(cm <sup>3</sup> /g) | Pore diameter (nm) |
|----------------------|----------------------------------|-------------------------------------|--------------------|
| OPP-1                | 595                              | 0.5247                              | 0.86               |
| OPP-2                | 520                              | 0.5024                              | 0.72               |
| OPP-3                | 458                              | 0.4982                              | 0.80               |

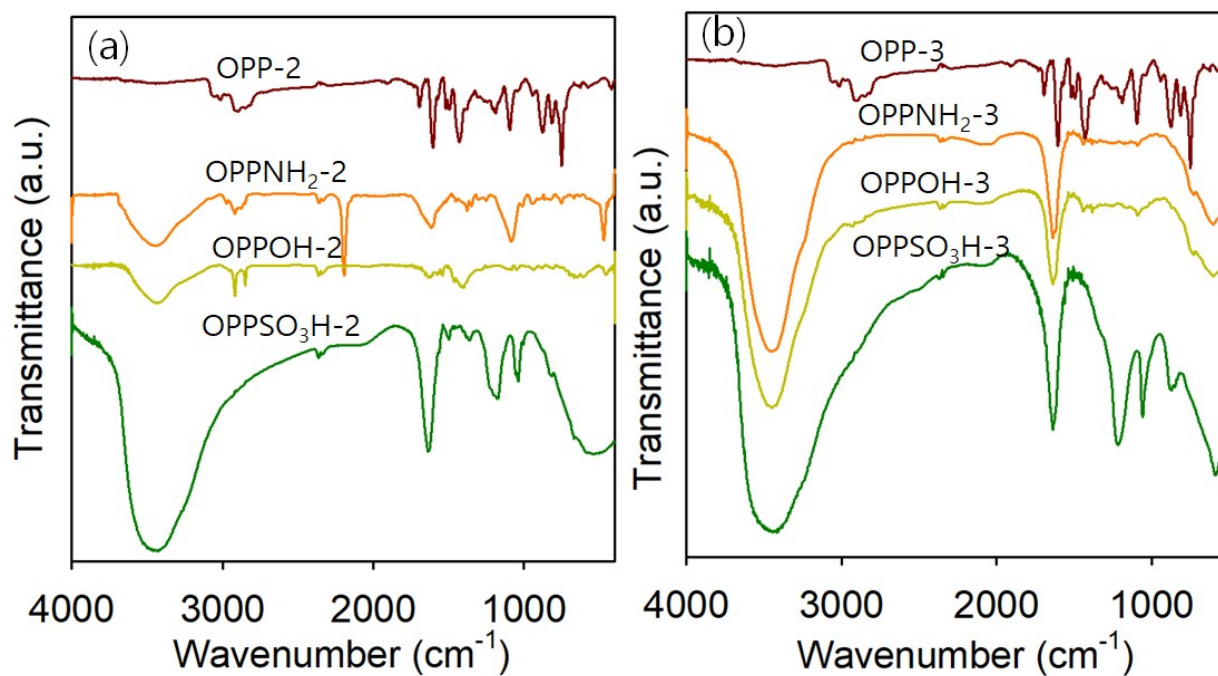

**Fig. S1.** FTIR spectra of OPP-2 (a) and OPP-3 (b), and their functionalized products.

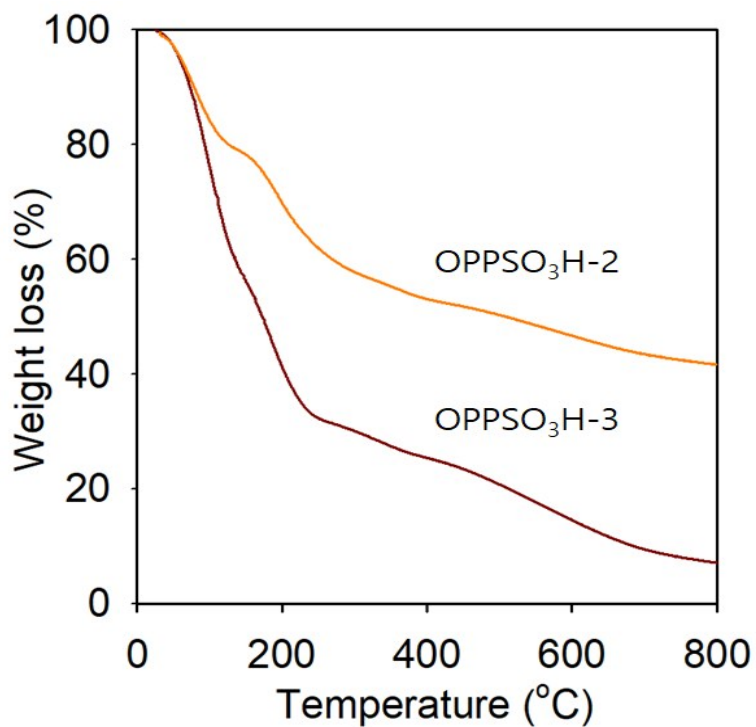

**Fig. S2.** TGA curves of OPPSO<sub>3</sub>H-2 and OPPSO<sub>3</sub>H-3.

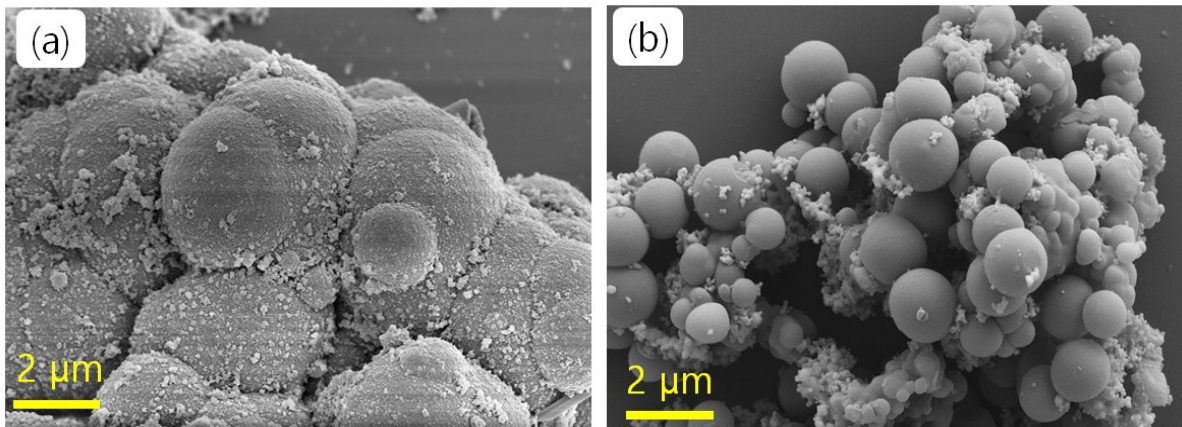

**Fig. S3.** FESEM images of OPPSO<sub>3</sub>H-2 (a) and OPPSO<sub>3</sub>H-3 (b).

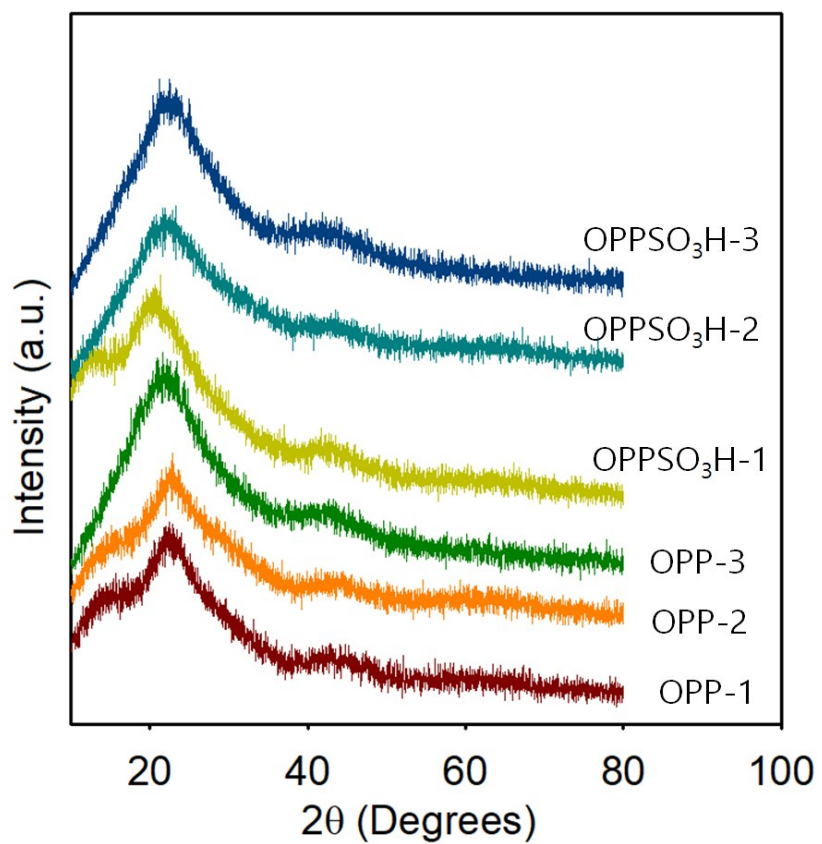

**Fig. S4.** XRD patterns of OPPs and OPPSO<sub>3</sub>Hs.

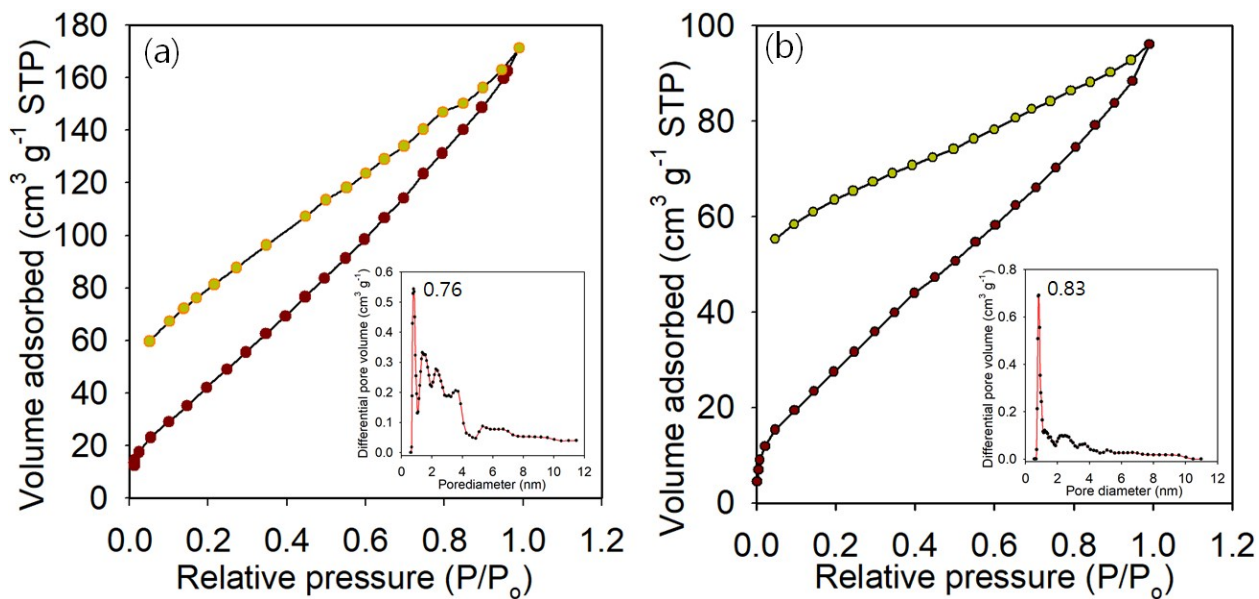

**Fig. S5.** N<sub>2</sub> adsorption/desorption isotherm and corresponding pore size distribution curves (shown in inset) calculated from NLDFT method of OPPSO<sub>3</sub>H-2 (a) and OPPSO<sub>3</sub>H-3(b).

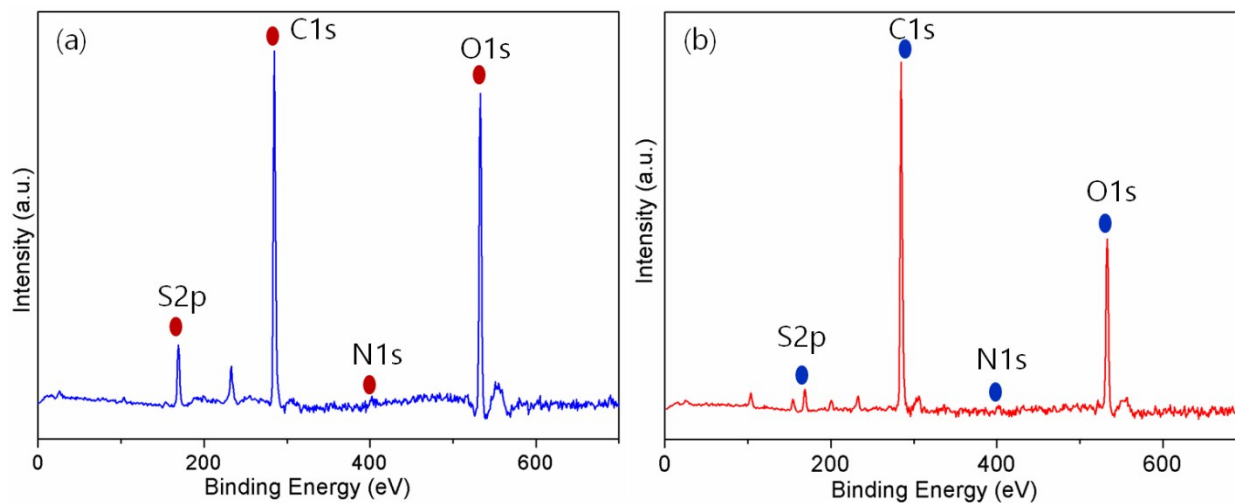

**Fig. S6.** Wide scan XPS spectra of OPPSO<sub>3</sub>H-2 (a) and , OPPSO<sub>3</sub>H-3 (b).

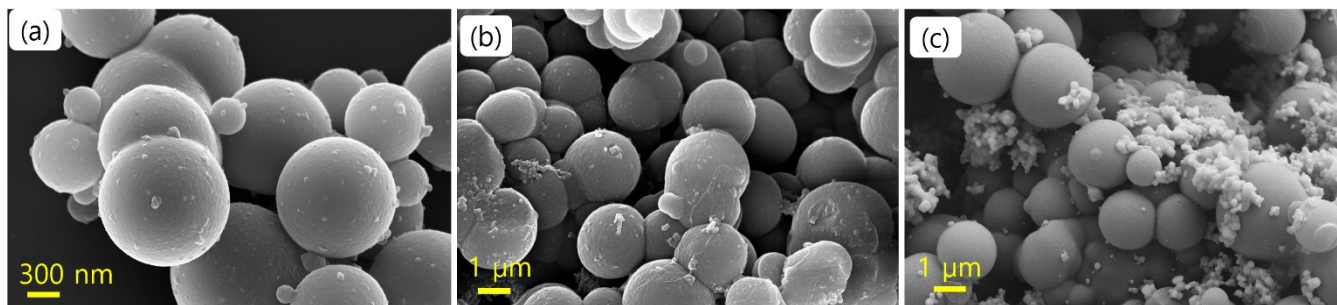

**Fig. S7.** FESEM images of OPPSO<sub>3</sub>H-1 (a) OPPSO<sub>3</sub>H-2 (b) and OPPSO<sub>3</sub>H-3 (c) after catalytic reactions.

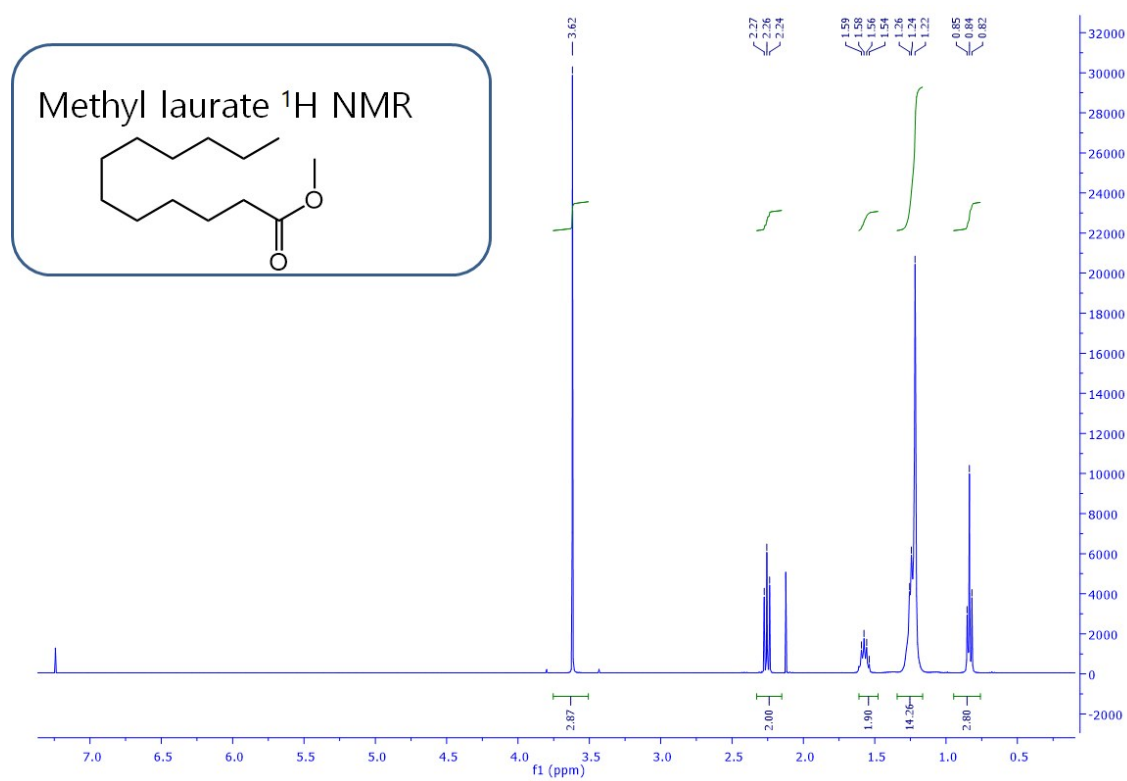

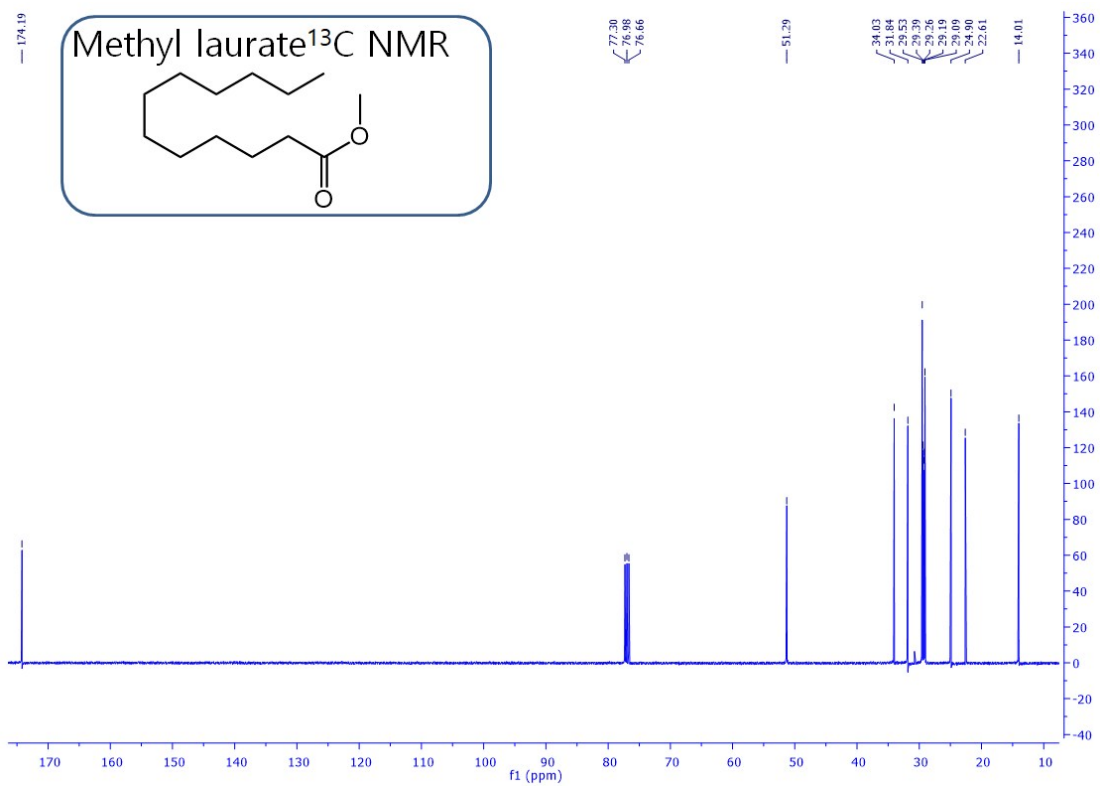

**Fig. S8.** <sup>1</sup>H and <sup>13</sup>C NMR spectra of methyl laurate obtained by esterification using OPPSO<sub>3</sub>H-1.

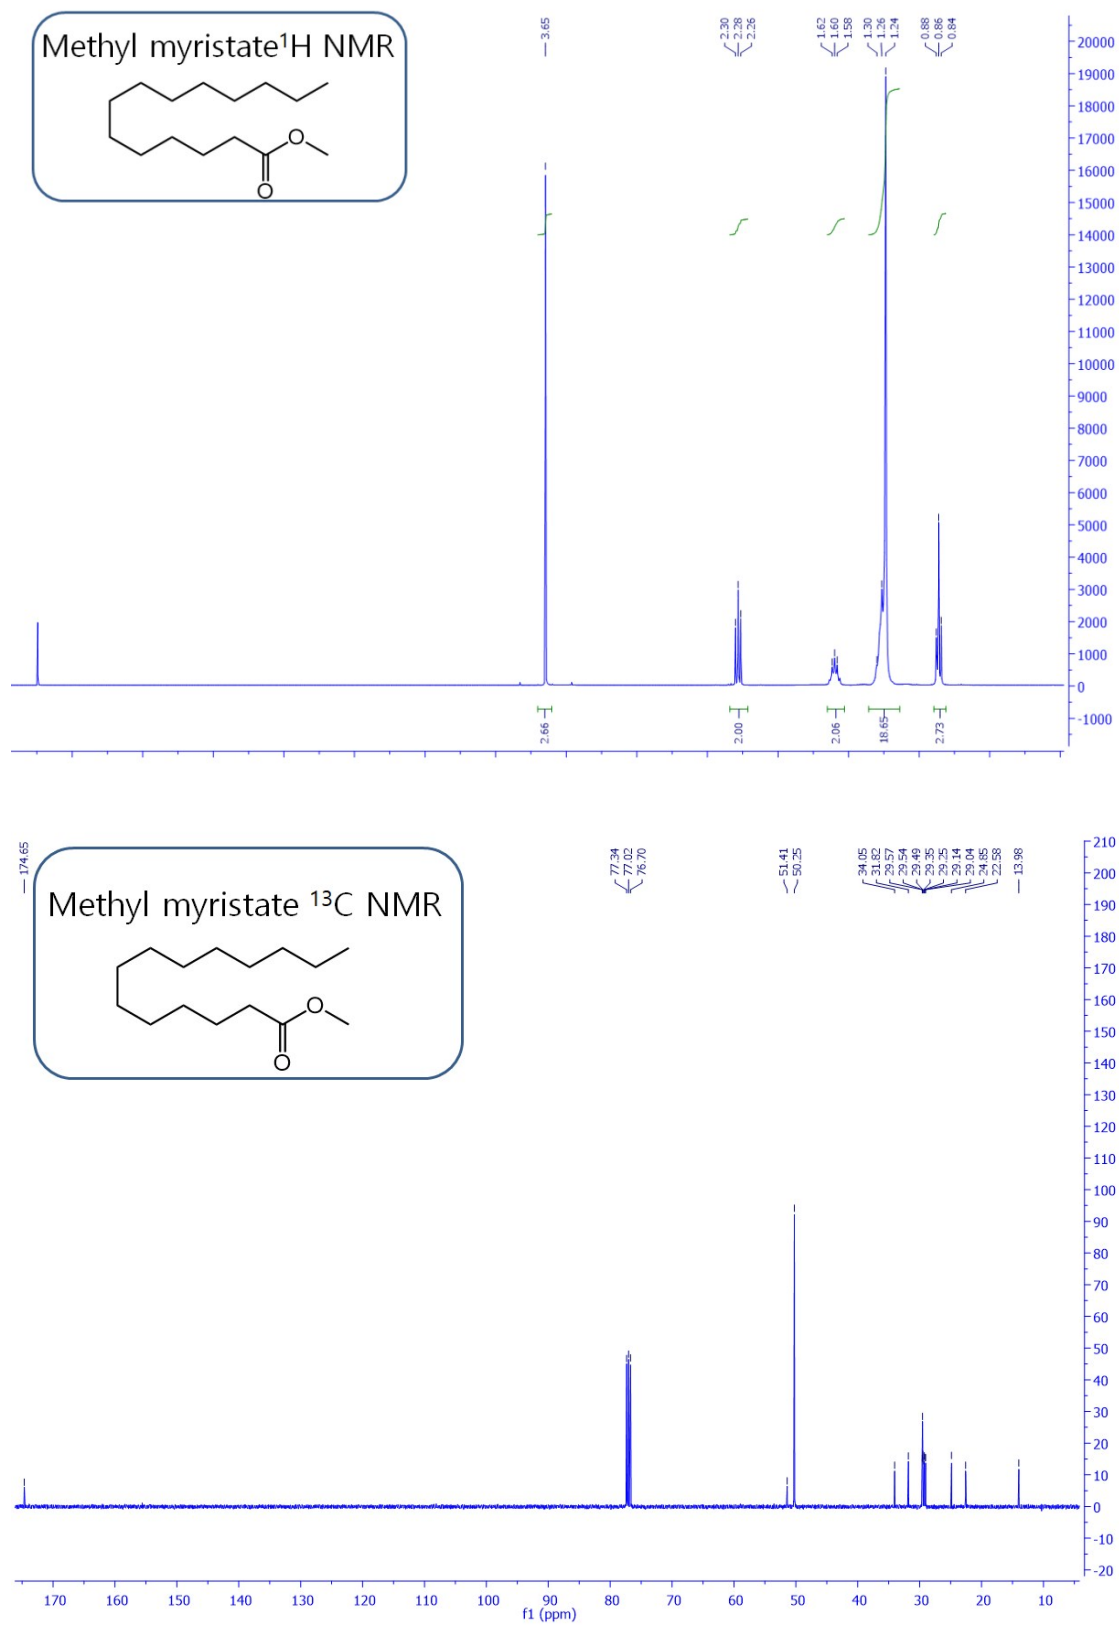

**Fig. S9.**  $^1\text{H}$  and  $^{13}\text{C}$  NMR spectra of methyl myristate obtained by esterification using OPPSO<sub>3</sub>H-1.



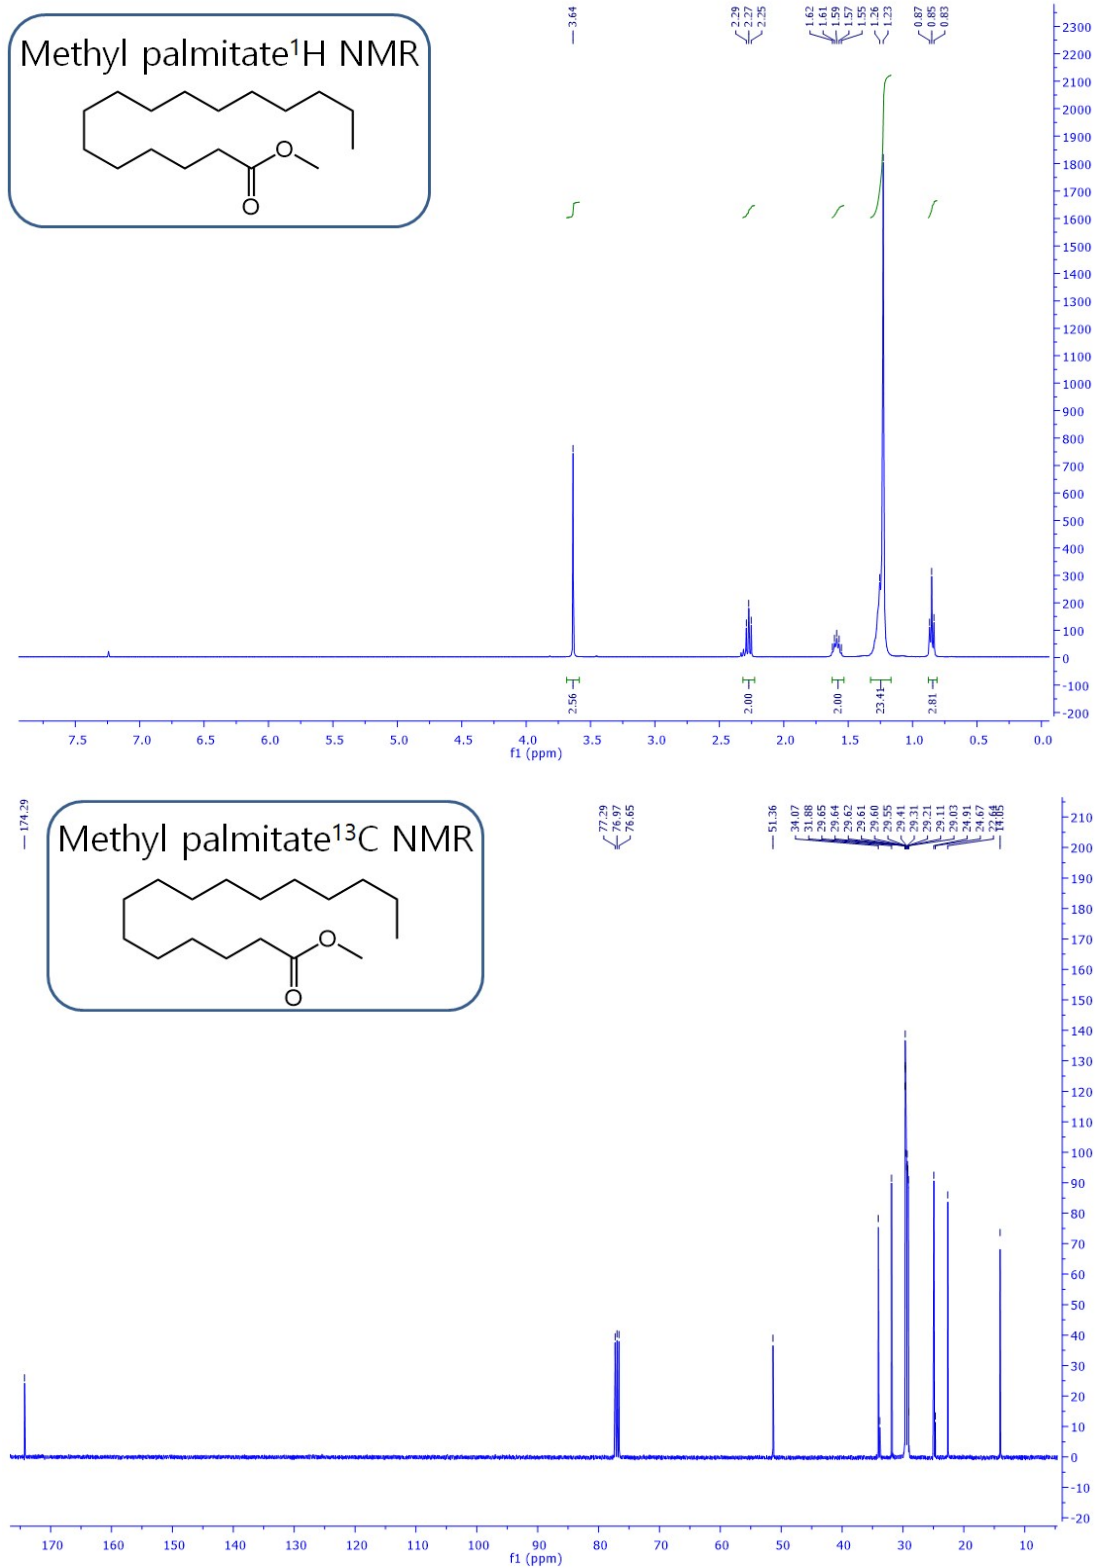

**Fig. S10.** <sup>1</sup>H and <sup>13</sup>C NMR spectra of methyl palmitate obtained by esterification using OPPSO<sub>3</sub>H-1.

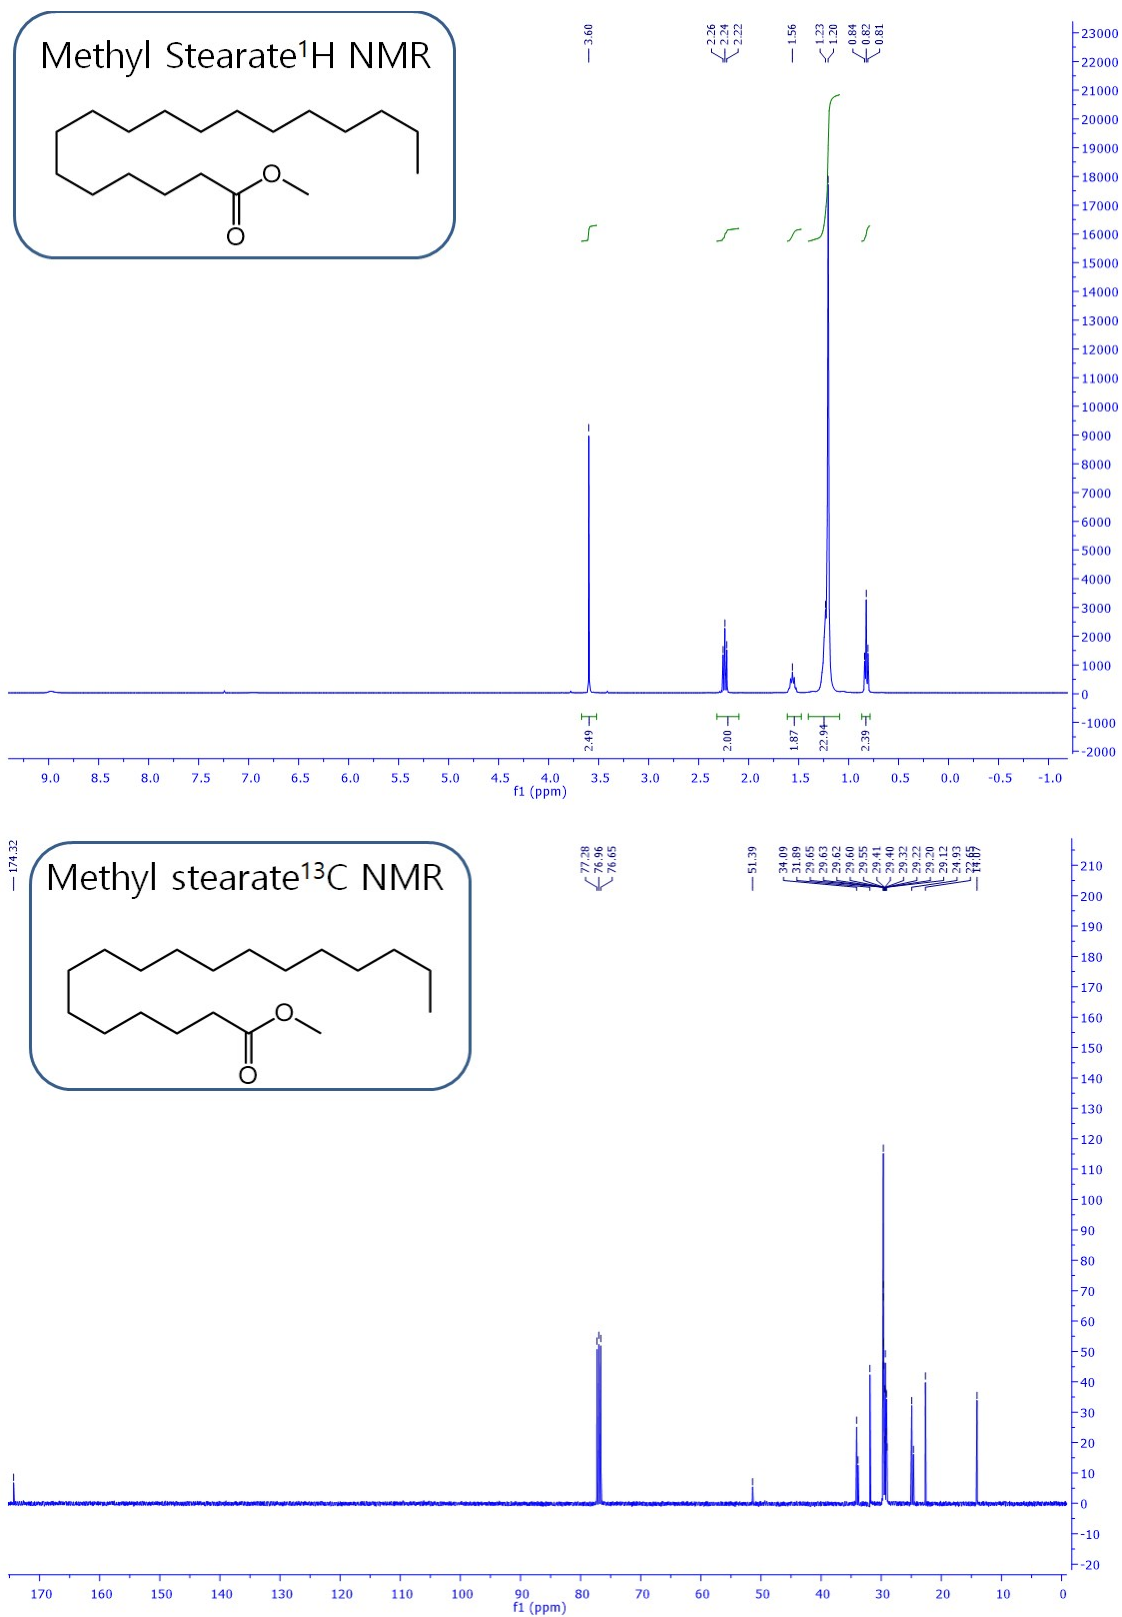

**Fig. S11.** <sup>1</sup>H and <sup>13</sup>C NMR spectra of methyl stearate obtained by esterification using OPPSO<sub>3</sub>H-1.

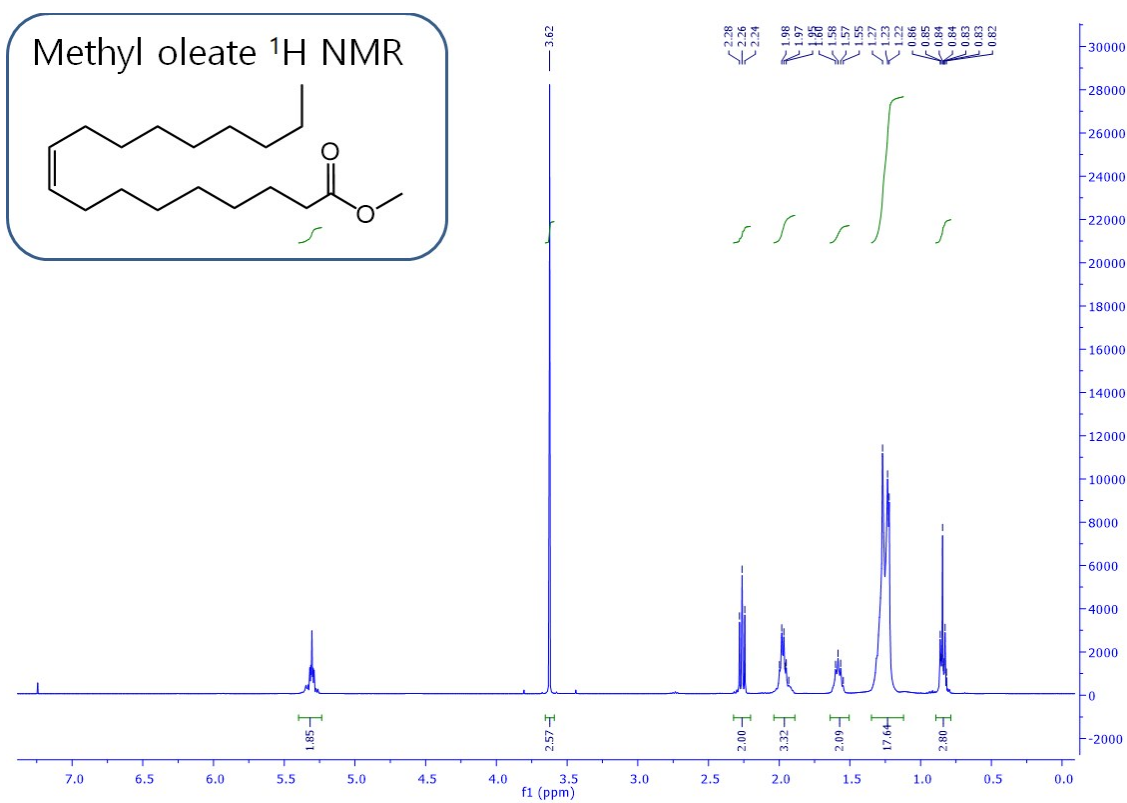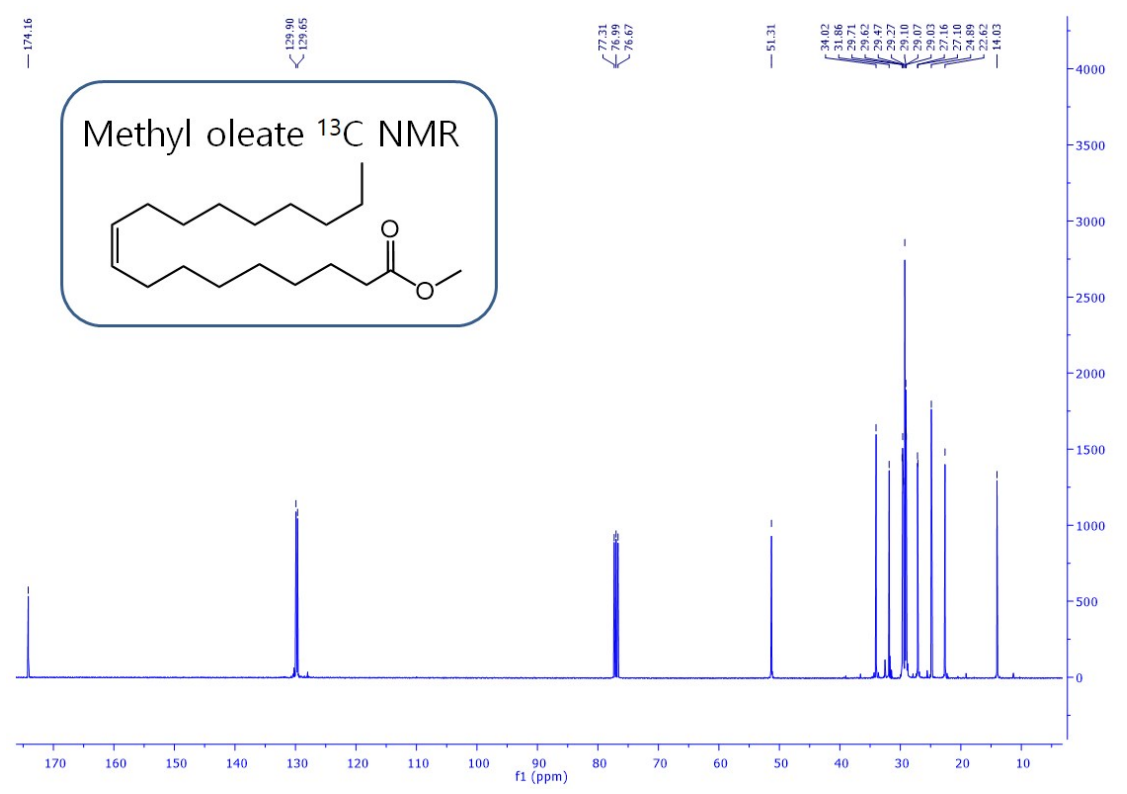

**Fig. S12.** <sup>1</sup>H and <sup>13</sup>C NMR spectra of methyl oleate obtained by esterification using OPPSO<sub>3</sub>H-1.

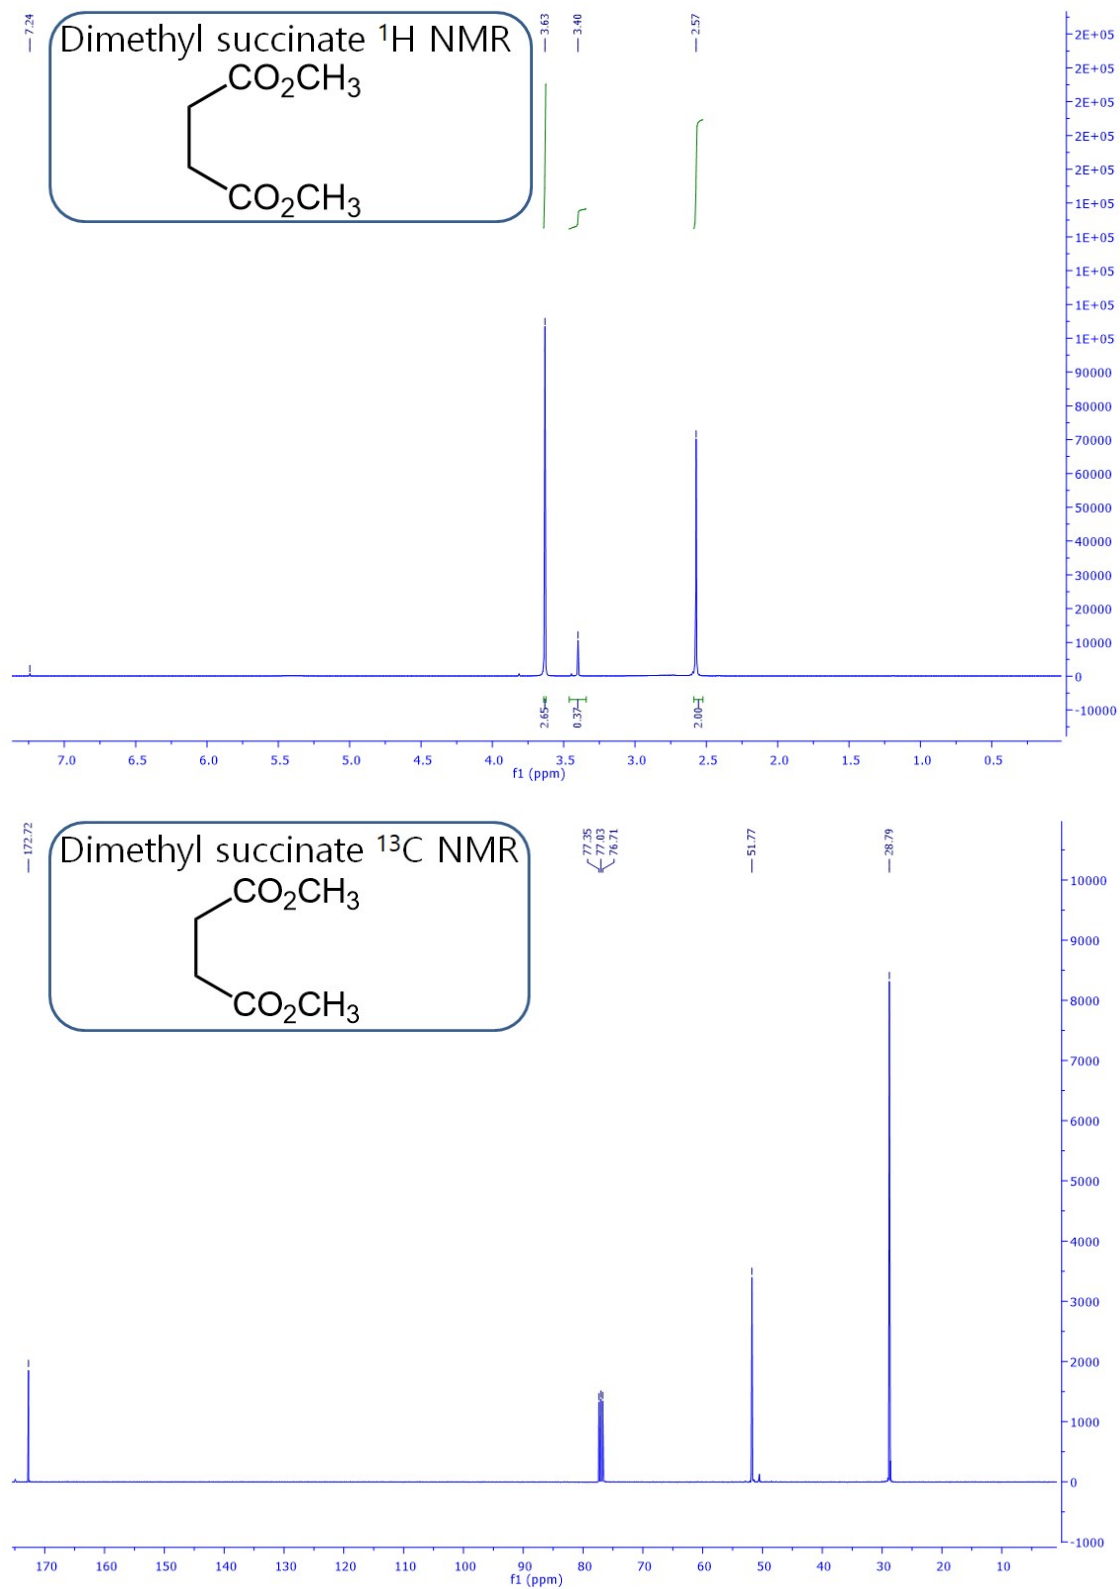

**Fig. S13.**  $^1\text{H}$  and  $^{13}\text{C}$  NMR spectra of dimethyl succinate obtained by esterification using OPPSO<sub>3</sub>H-1.

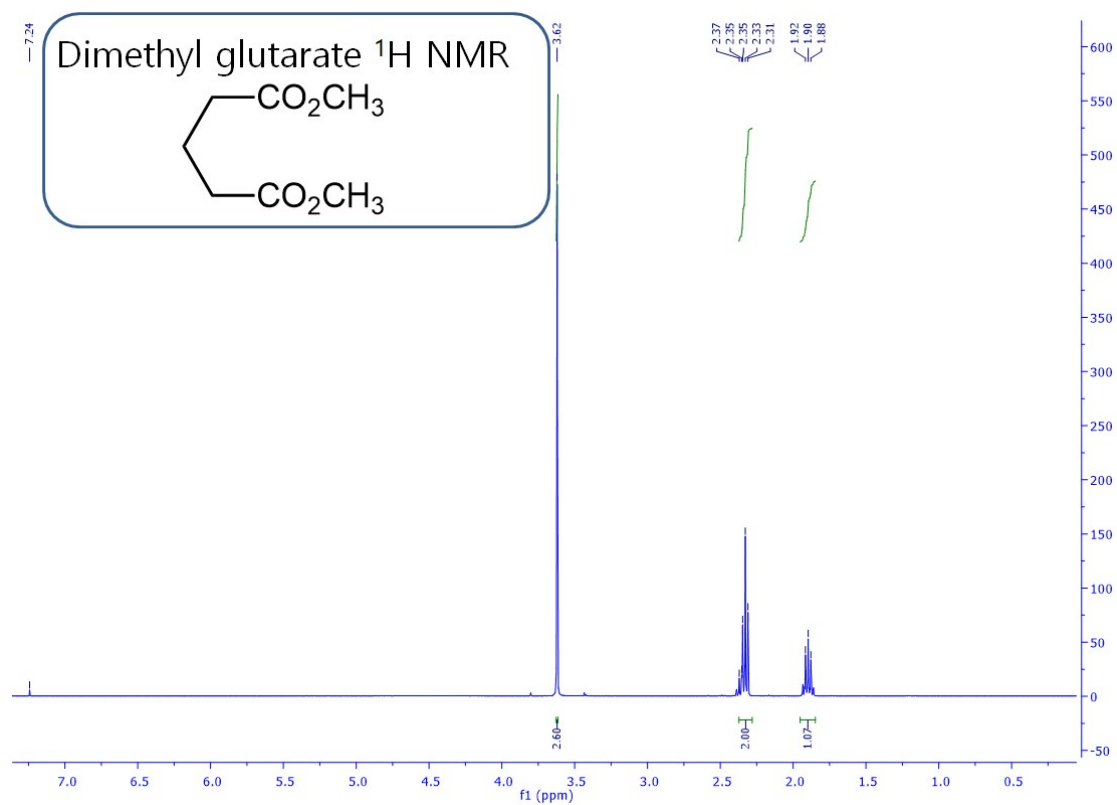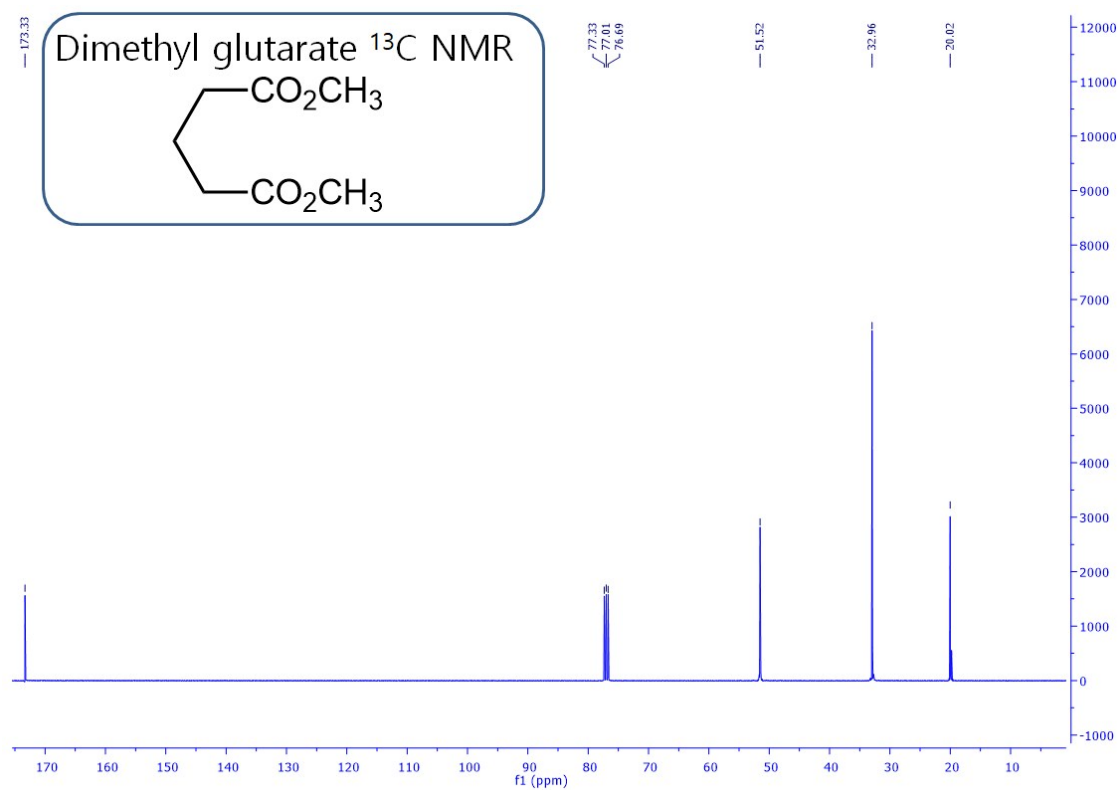

**Fig. S14.**  $^1\text{H}$  and  $^{13}\text{C}$  NMR spectra of dimethyl glutarate obtained by esterification using OPPSO<sub>3</sub>H-1.

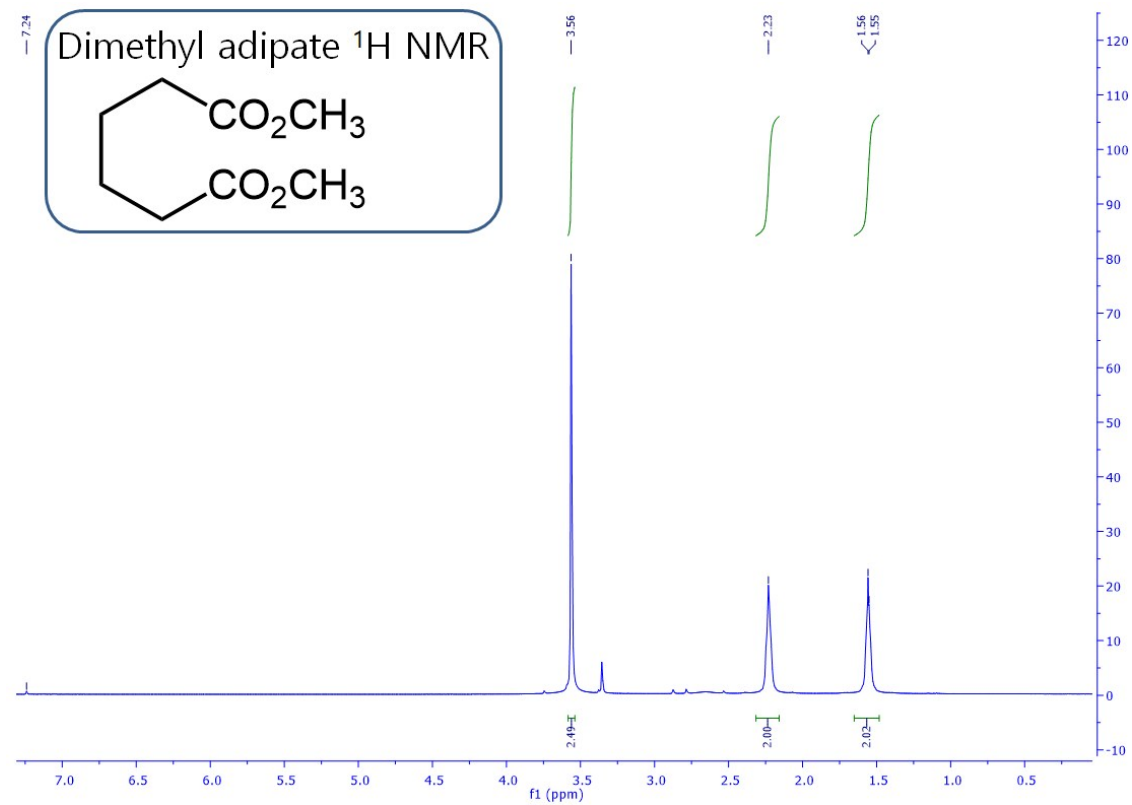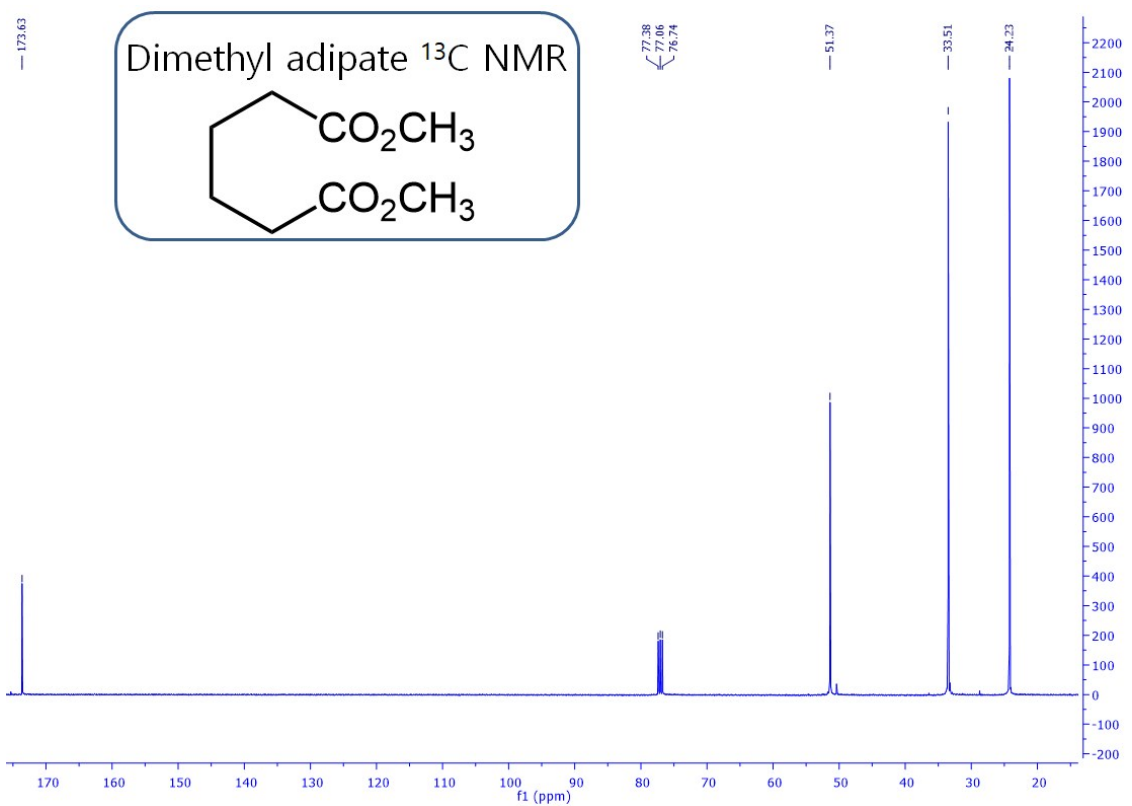

**Fig. S15.**  $^1\text{H}$  and  $^{13}\text{C}$  NMR spectra of dimethyl adipate obtained by esterification using  $\text{OPPSO}_3\text{H-1}$ .

### <sup>1</sup>H NMR of soybean oil ester

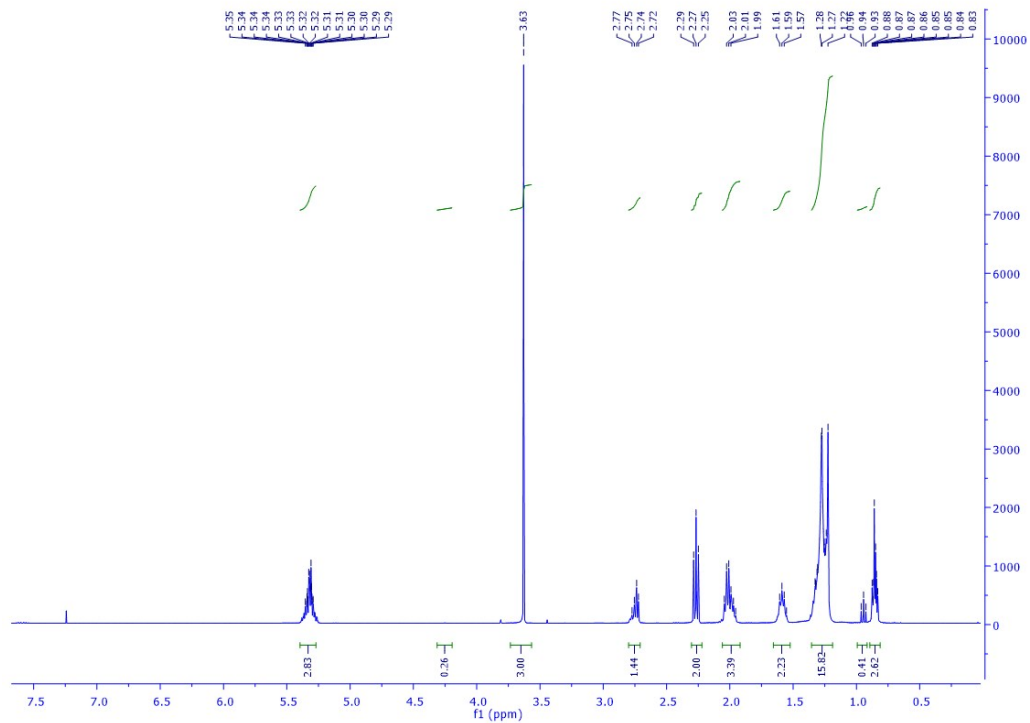

### <sup>13</sup>C NMR of soybean oil ester

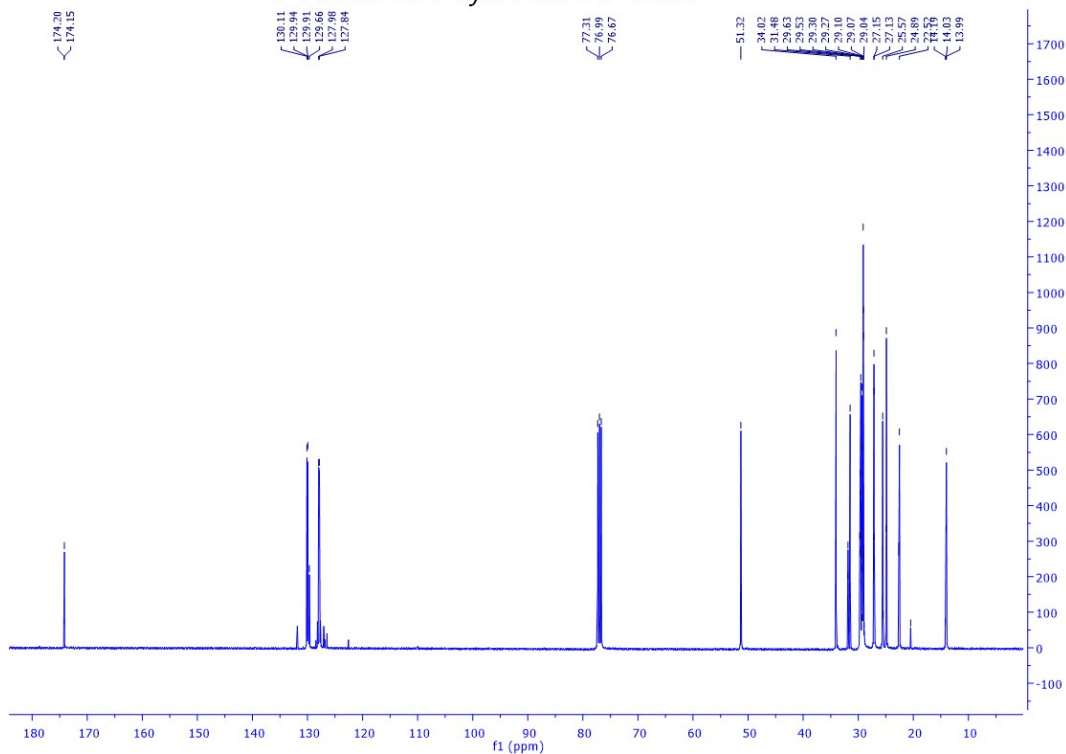

**Fig. S16.** <sup>1</sup>H and <sup>13</sup>C NMR spectra of soybean oil ester obtained by transesterification using OPPSO<sub>3</sub>H-1.

### $^1\text{H}$ NMR of linseed oil ester

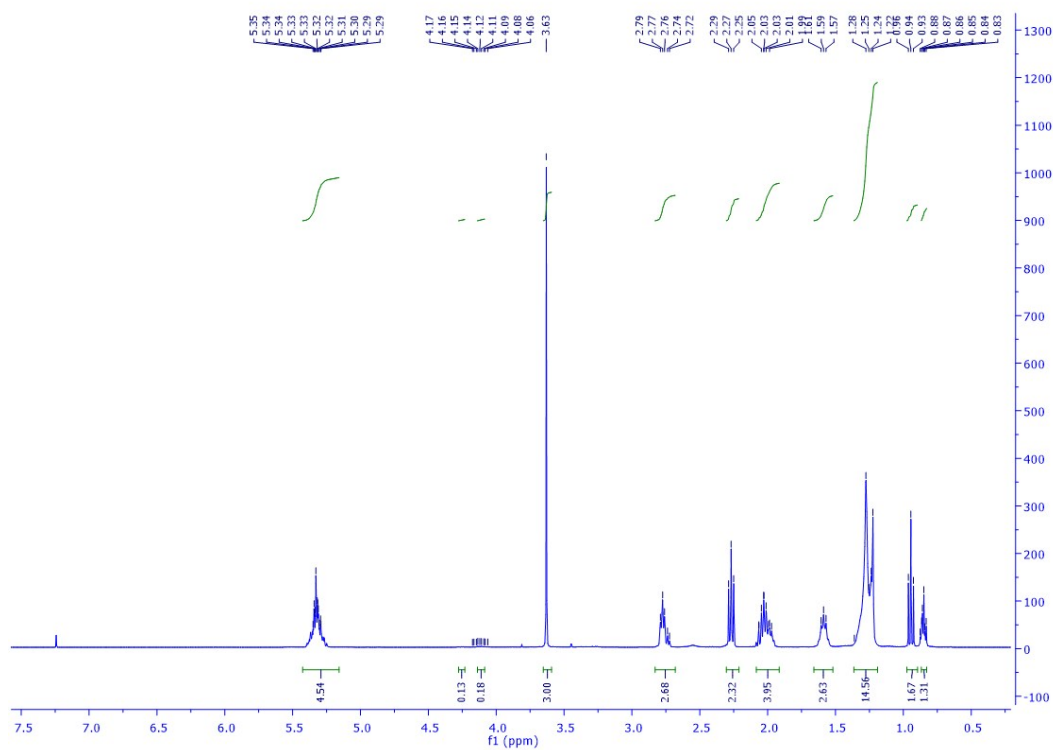

### $^{13}\text{C}$ NMR of linseed oil ester

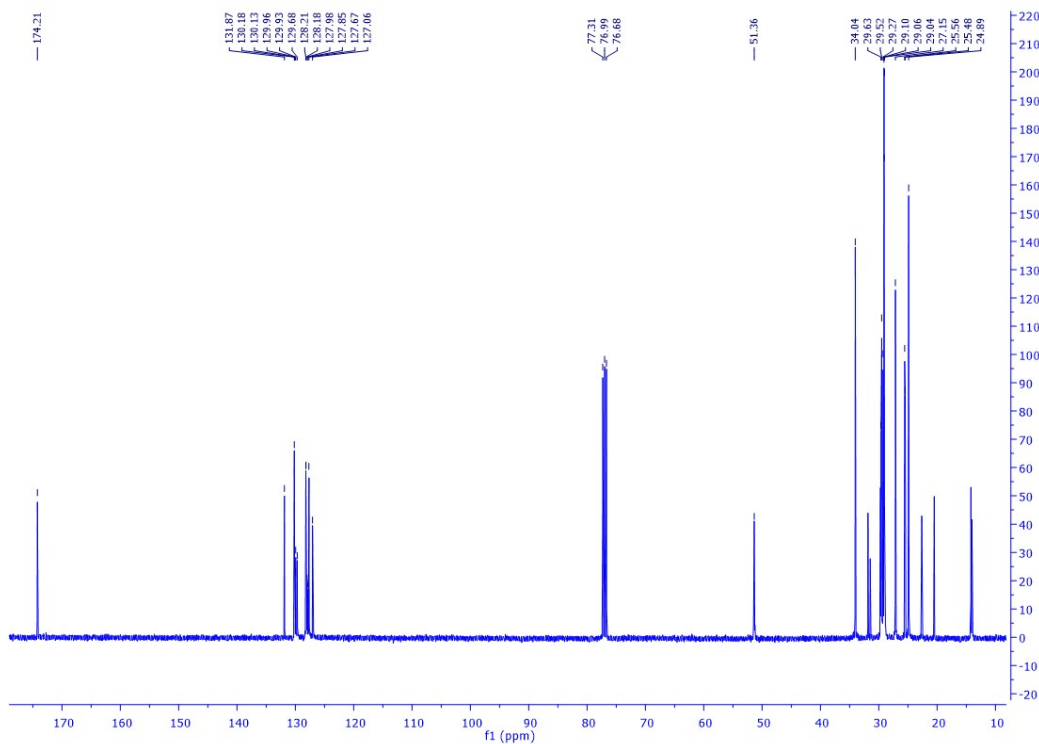

**Fig. S17.**  $^1\text{H}$  and  $^{13}\text{C}$  NMR spectra of linseed oil ester obtained by transesterification using OPPSO<sub>3</sub>H-1.



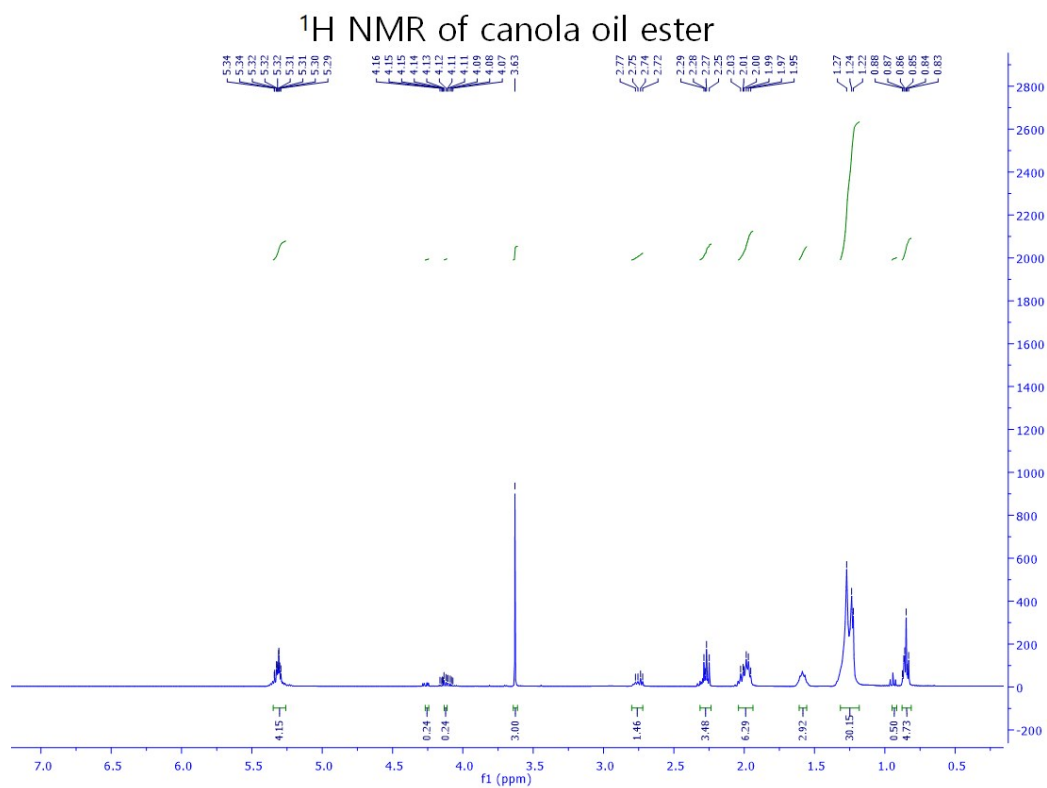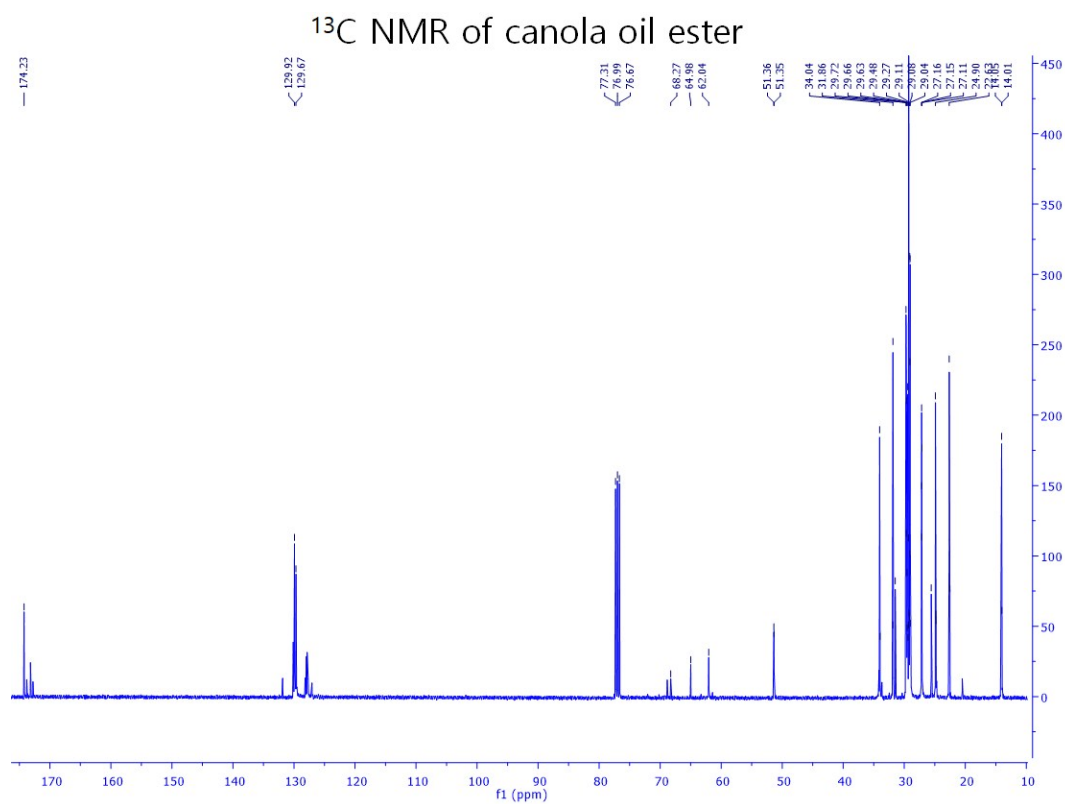

**Fig. S18.** <sup>1</sup>H and <sup>13</sup>C NMR spectra of canola oil ester obtained by transesterification using OPPSO<sub>3</sub>H-1.

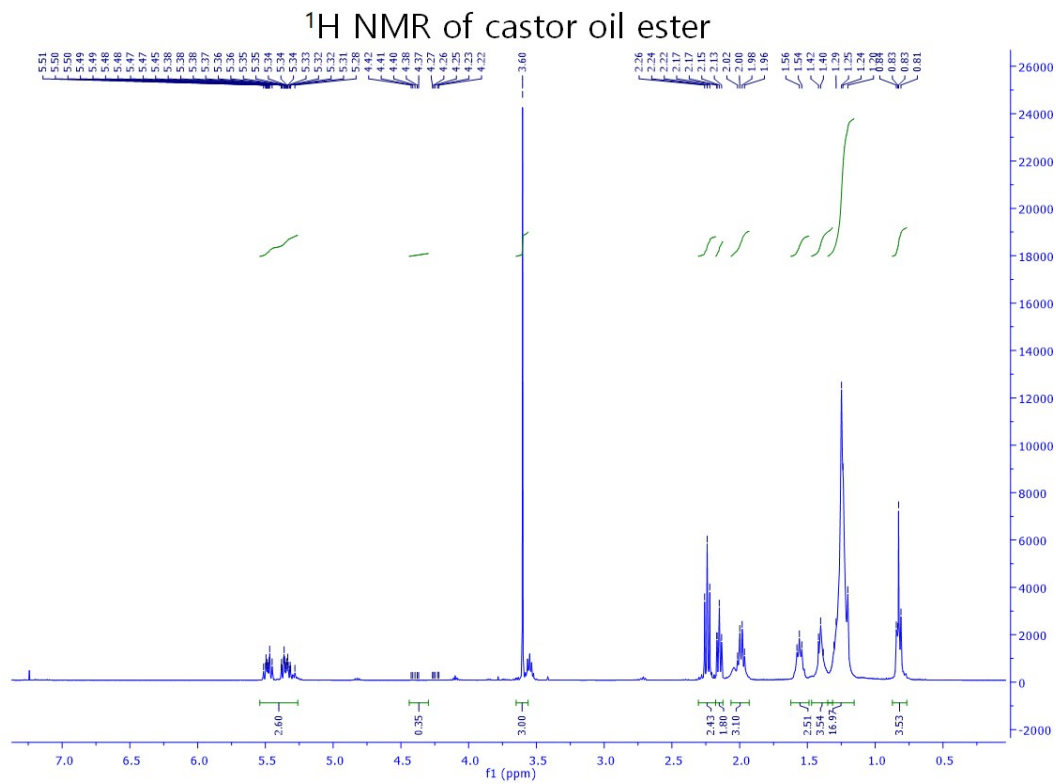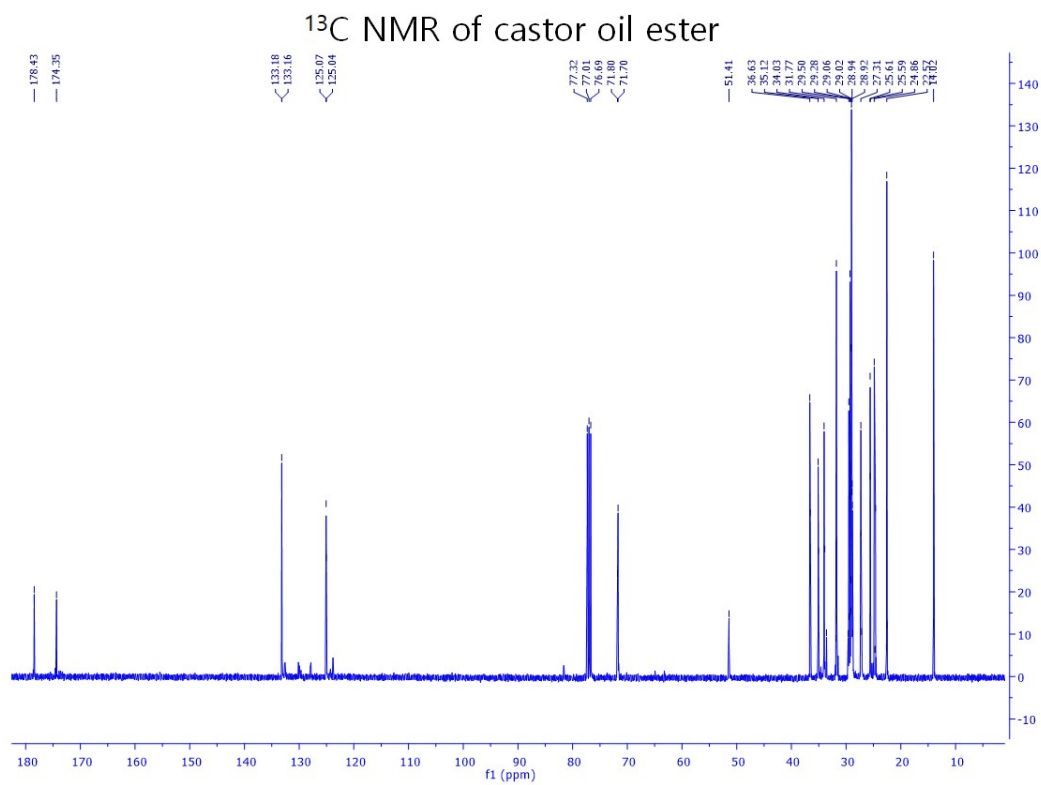

**Fig. S19.** <sup>1</sup>H and <sup>13</sup>C NMR spectra of castor oil ester obtained by transesterification using OPPSO<sub>3</sub>H-1.

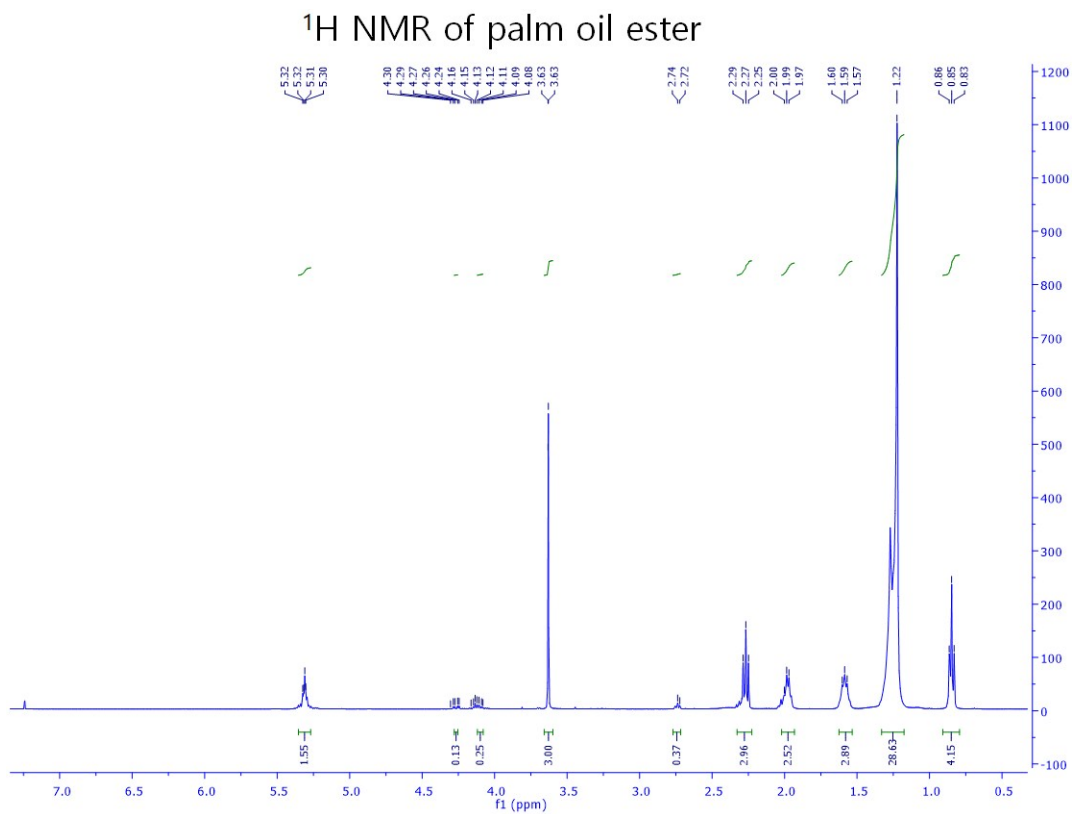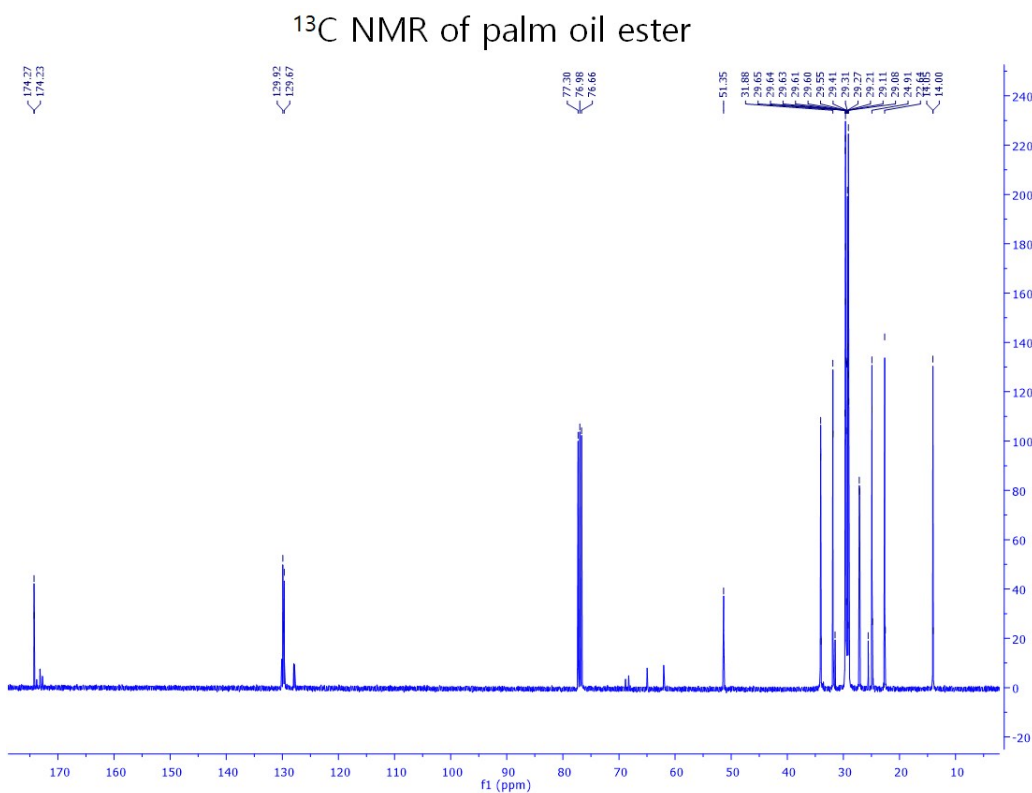

**Fig. S20.**  $^1\text{H}$  and  $^{13}\text{C}$  NMR spectra of palm oil ester obtained by transesterification using OPPSO<sub>3</sub>H-1.

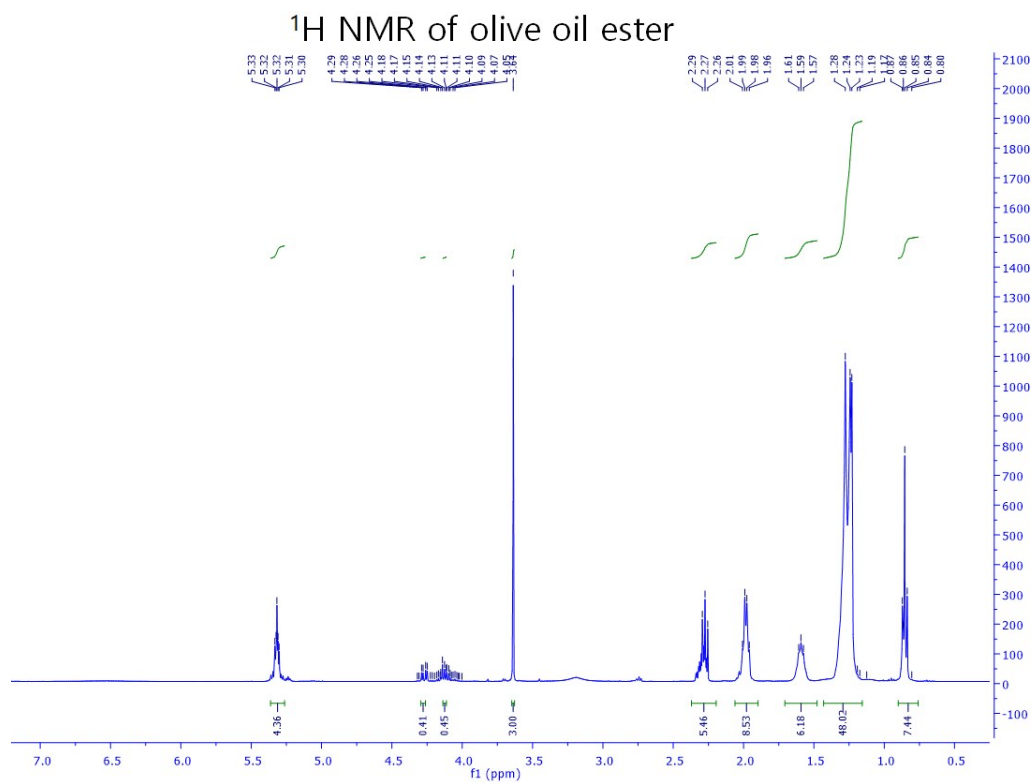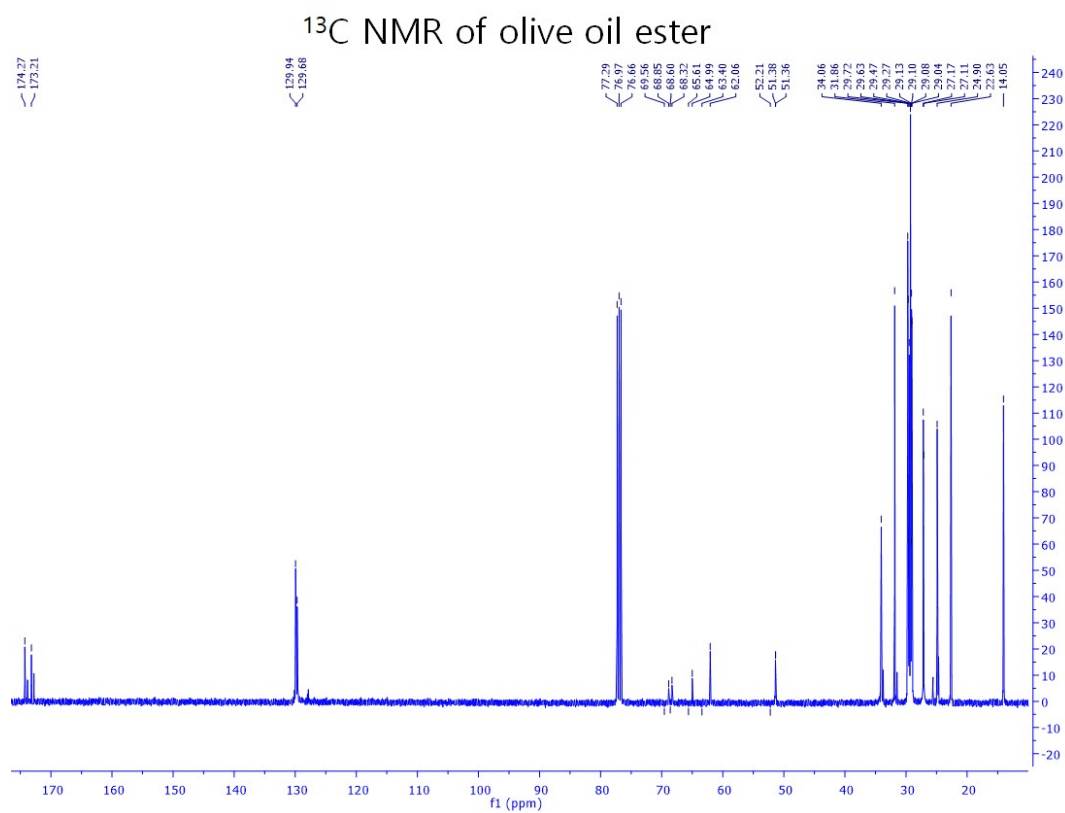

**Fig. S21.**  $^1\text{H}$  and  $^{13}\text{C}$  NMR spectra of olive oil ester obtained by transesterification using OPPSO<sub>3</sub>H-1.
